# Supplementary material for: En route to traceable reference standards for surface group quantifications by XPS, NMR and fluorescence spectroscopy
Source: Royal Society of Chemistry journal article supplement (doi:10.1039/c4an02248c), 2015-01-01
Supplement: c4an02248c1.pdf [file c4an02248c1.pdf]

# En Route to Traceable Reference Standards for Surface Group Quantifications by XPS, NMR and Fluorescence Spectroscopy

*Andreas Hennig,<sup>\*ab</sup> Paul M. Dietrich,<sup>\*a</sup> Felix Hemmann,<sup>a</sup> Thomas Thiele,<sup>c</sup> Heike Borcharding,<sup>c</sup>  
Angelika Hoffmann,<sup>a</sup> Uwe Schedler,<sup>c</sup> Christian Jäger,<sup>a</sup> Ute Resch-Genger,<sup>\*a</sup> and Wolfgang E. S.  
Unger<sup>a</sup>*

<sup>a</sup> BAM Federal Institute for Materials Research and Testing, Richard-Willstaetter-Strasse 11,  
12203 Berlin, Germany, E-mail: paul.dietrich@bam.de, ute.resch@bam.de.

<sup>b</sup> Jacobs University Bremen, School of Engineering and Science, Campus Ring 1, 28759 Bremen,  
Germany, E-mail: a.hennig@jacobs-university.de.

<sup>c</sup> PolyAn GmbH, Rudolf-Baschant-Strasse 2, 13086 Berlin, Germany.

## Contents

|                               |   |
|-------------------------------|---|
| 1. Abbreviations .....        | 2 |
| 2. Supporting Figures .....   | 2 |
| 3. Experimental Details ..... | 3 |
| 4. Methods .....              | 4 |
| 5. References .....           | 7 |

## 1. Abbreviations

EDC: 1-ethyl-3-(3-dimethylaminopropyl) carbodiimide hydrochloride salt; FITC: fluorescein isothiocyanate; FL-A: 1,6-diaminohexyl-FITC; MES: 2-(*N*-morpholino)ethanesulfonic acid; NMR: nuclear magnetic resonance spectroscopy; PAA: poly(acrylic acid); PMMA: poly(methyl methacrylate); PTFEAA: poly(*N*-(2,2,2-trifluoroethyl)acrylamide); PNVP: poly(*N*-vinylpyrrolidone); rcf: relative centrifugal force; TFEA: trifluoroethylamine; XPS: X-ray photoelectron spectroscopy.

## 2. Supporting Figures

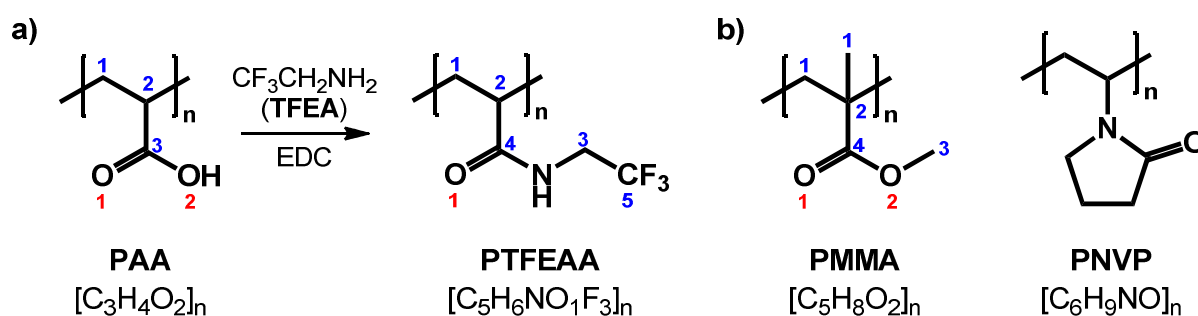

**Scheme S1.** a) Chemical derivatization reaction of poly(acrylic acid) (PAA, left) grafted microparticles using EDC-mediated amidation with 2,2,2-trifluoroethylamine (CF<sub>3</sub>CH<sub>2</sub>NH<sub>2</sub>, TFEA) yielding poly(*N*-(2,2,2-trifluoroethyl)acrylamide) (PTFEAA, right). b) Chemical structure of poly(methyl methacrylate) (PMMA) and poly(*N*-vinylpyrrolidone) (PNVP).

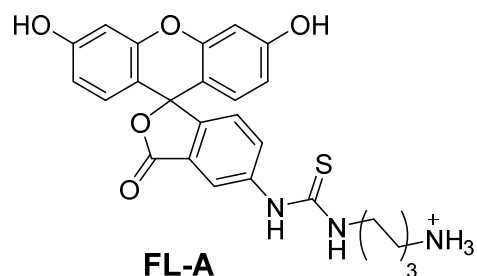

**Chart S1.** Chemical structure of FL-A.

### 3. Experimental Details

**Materials.** If not noted otherwise, all chemicals were purchased from Sigma-Aldrich (Steinheim, Germany), AppliChem (Darmstadt, Germany), J. T. Baker (Deventer, Netherlands), Carl Roth (Karlsruhe, Germany) or Merck (Darmstadt, Germany) and were of highest purity available when used for analytical measurements. PMMA microparticles (diameter 6  $\mu\text{m}$ ) with varying amounts of PAA were individually prepared by PolyAn GmbH (Berlin, Germany) for this study. Gold substrates (Georg Albert PVD, Germany) were prepared by thermal evaporation of 30 nm of Au (purity 99.99%) onto polished single-crystal Si (100) wafers that had been pre-coated with a 9 nm titanium adhesion layer.

**Sample Preparation.** Surface functionalization with 2,2,2-trifluoroethylamine (TFEA)<sup>1-3</sup> was adapted from an established protocol.<sup>4</sup> 10 mg polymer microparticles were washed into 660  $\mu\text{L}$  reaction buffer (0.1 M MES, pH 5.0) by repeated cycles (>5) of centrifugation (5000 rcf), removal of supernatant and refilling of reaction buffer. Subsequently, 50  $\mu\text{L}$  400 mM TFEA hydrochloride in reaction buffer were added. The reaction was started by adding 80  $\mu\text{L}$  of 100 mg/mL (0.52 M) EDC hydrochloride freshly dissolved in 4 °C cold water. The total reaction volume was 800  $\mu\text{L}$ , final conditions were 12.5 mg/mL polymer microparticles, 25 mM TFEA, and 52 mM EDC. After 3 h reaction time at room temperature, the microparticles were washed into 1 mL neat water.

Powdered samples for solid-state NMR were prepared by slow evaporation of the microparticle suspensions in a vacuum drying oven at 40 °C and < 50 mbar.

Microparticle samples for XPS were prepared by drop casting several drops (1-10  $\mu\text{l}$ ) of aqueous microparticles suspensions (10 mg/ml) on glass or gold-coated silicon substrates and were allowed to dry overnight in a closed petri dish. That was repeated until the substrate was covered homogeneously. PAA reference films for XPS were prepared by spin coating (4000 rpm,

30 sec) of a 3% (w/w) aqueous PAA solution on a 1×1 cm<sup>2</sup> piece of silicon or gold-coated Si wafer.

#### 4. Methods

**Fluorescence Spectroscopy.** Fluorescence measurements were performed as described previously.<sup>4</sup>

**X-ray Photoelectron Spectroscopy (XPS).** XPS measurements were carried out with an AXIS Ultra DLD electron spectrometer manufactured by Kratos Analytical, UK. XPS spectra were recorded using monochromated Al K $\alpha$  excitation at a pass energy of 80 eV for survey spectra and 20 eV for the core-level and valence band spectra. The electron emission angle was 0° and the source-to-analyzer angle was 60°. The binding energy scale of the instrument was calibrated following a Kratos Analytical procedure, which uses ISO 15472 binding energy data.<sup>6</sup> Spectra were taken by setting the instrument to the hybrid lens mode and the slot mode providing approximately a 300 x 700  $\mu\text{m}^2$  analysis area.

In case of insulating samples, the charge neutralizer was used. The binding energy scale was furthermore corrected for charging<sup>7</sup>, using an electron binding energy of 285.0 eV<sup>8</sup> for the C 1s level of aliphatic hydrocarbon. Spectra are decomposed with the CasaXPS peak fit program, version 2.3.15 from Casa Software Ltd. (United Kingdom). A Gaussian/Lorentzian product function peak shape model GL(30) (70% Gaussian, 30% Lorentzian) was used in combination with a Shirley background. Curve fittings of C 1s and O 1s core-level spectra were done according to previous reports.<sup>8,9</sup> Elemental compositions from survey spectra are calculated using peak areas normalized on the basis of acquisition parameters after a Shirley background subtraction, experimental sensitivity factors and transmission factors provided by the manufacturer. Damage of polymer microparticles by X-ray radiation was not observed.

**NMR.** Solid-state NMR experiments were performed on a Bruker Avance 600 spectrometer (14.1 T). All experiments were carried out at room temperature using a 2.5 mm magic angle sample spinning (MAS) probe for solid-state NMR experiments. All samples were placed with spacers in the middle section (3mm filling height) of a 2.5mm rotor where the  $B_1$  field inhomogeneity is less than 5%. The MAS rotation frequency was 25 kHz. The  $90^\circ$  pulse length was 3.1  $\mu$ s. The number of scans was: 1024 for P946, 24576 for P35 and 40960 for P99 particles, respectively. The repetition time was 2 sec and ensures full  $T_1$  relaxation of the  $CF_3$   $^{19}F$  signal. 4-(trifluoromethyl)benzoic acid was used as intensity reference standard. It was filled in another rotor (4.78 mg standard) in the same manner as for the analyte samples. The repetition time here was 20 sec to avoid saturation. 32 scans were accumulated. All spectra were run under the same experimental conditions, specifically with the same receiver gain. To check spectrometer stability first the analyte sample was run followed by the reference rotor experiment. This procedure was repeated three times. The maximum deviation between the signal intensities of the analyte sample (similarly for the standard) was less than 1%. Data analysis was performed with the software TopSpin 2.1 (and 3.0) and DMFIT.<sup>10</sup>

**Quantification of surface-bound TFEA.** The applied amidation reaction of surface carboxyl ( $CO_2H$ ) groups on PMMA/PAA core-shell microparticles for quantification of surface-bound TFEA by XPS and  $^{19}F$ -NMR is illustrated in Scheme S1.

**XPS.** The measurand is here the amount fraction of carboxylic acid carbon atoms before TFEA labeling expressed as percentage,  $x_{CO_2H}$ , of the total carbon amount described by equation 1.

$$x_{CO_2H} = \frac{n_{CO_2H}}{n_{C_{total}}} \times 100 \quad (1)$$

with

$$n_{C_{total}} = n_{CO_2H} + n_{C_R} \quad (2)$$

where  $n_{CO_2H}$  is the amount of carboxylic acid carbon atoms,  $n_{C_{total}}$  the total amount of carbon, and  $n_{C_R}$  the amount of all remaining carbon atoms that are not located in  $CO_2H$  groups, respectively.

The Quantitative Elemental Analysis (QEA) approach for quantification of  $x_{COOH}$  was applied by quantification of XPS survey scans using the intensities of C 1s and F 1s photoelectron peaks (measured in atomic percent, at.%).<sup>11</sup> The QEA data set has to be corrected for additional TFEA related elements (C, N, and F) that are introduced during the derivatization reaction. According to the mass balance law, a more generalized equation follows from Scheme 1.

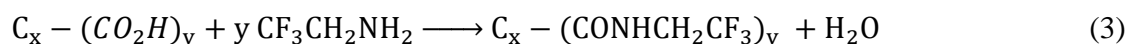

with

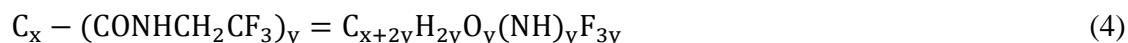

where

$$y = \frac{1}{3} \times \frac{I_{F_{1s}}}{RSF_{F_{1s}}} = \frac{[F]}{3} \quad (5) \quad \text{and} \quad x = \frac{I_{C_{1s}}}{RSF_{C_{1s}}} - 2y = [C] - \frac{2[F]}{3} \quad (6)$$

$I_{F_{1s}}$  and  $I_{C_{1s}}$  are the XPS intensities of F 1s and C 1s determined from the survey scan after TFEA derivatization, and  $RSF_{F_{1s}}$   $RSF_{C_{1s}}$  are the relative sensitivity factor of F 1s and C 1s taken from the Kratos element library. Finally  $x_{COOH}$  can be calculated from eq. 1–6 according to eq. 7.

$$x_{CO_2H} = \frac{y}{x} \times 100 = \frac{[F]}{3[C]-2[F]} \times 100 \quad (7)$$

The derivatization reaction yield ( $X$ ) can then be calculated by taking into account that 1/3 of all carbon atoms in PAA are located in carboxylic acid ( $CO_2H$ ) moieties.

$$X = 3 \times x_{CO_2H} \quad (8)$$

Alternatively the derivatization reaction yield ( $X$ ) can be calculated using relative  $\text{CF}_3$  component peak areas from the C 1s core level spectra according to eq. 9.

$$X = \frac{\text{CF}_{3,\text{exp.}}}{\text{CF}_{3,\text{stoich.}}} \times 100 \quad (9)$$

Here  $\text{CF}_{3,\text{exp.}}$  refers to the  $\text{CF}_3$  relative peak area as obtained from the fit of measured C 1s core-level spectra, while  $\text{CF}_{3,\text{stoich.}}$  is the fraction derived from the theoretical stoichiometry of a completely derivatized PAA shell (*cf.* Scheme 1). And from the chemical structure of PTFEAA (the quantitatively derivatized PAA) shown in Scheme 1 it follows  $\text{CF}_{3,\text{stoich.}} = 20\%$ .

**NMR.** The  $\text{CF}_3$  signal position of the analyte samples appears at -70.5 ppm (*c.f.* Fig. 1). The  $\text{CF}_3$  group concentration of the analyte samples  $N_{\text{Sample}}$  is calculated in the usual fashion<sup>12,13</sup> from the weight of the sample  $m_{\text{Sample}}$ , the signal intensity  $I_{\text{Sample}}$ , the actual number of scans  $A_{\text{Sample}}$ , as well as the weight of the standard  $m_{\text{Std}}$ , the molar weight  $M_{\text{Std}}$  (190,42 g/mol), the signal intensity  $I_{\text{Std}}$  and the number of scans  $A_{\text{Std}}$  (here 32 scans).

$$\frac{N_{\text{Sample}}}{m_{\text{Sample}}} = \frac{I_{\text{Sample}}}{I_{\text{Std}}} * \frac{A_{\text{Std}}}{A_{\text{Sample}}} * \frac{m_{\text{Std}}}{M_{\text{Std}}} / m_{\text{Sample}} \quad (10)$$

The results are listed in Table S1. The uncertainty is about 5%.

**Table S1.** Sample weights and detected concentrations of  $\text{CF}_3$  groups at -70.7 ppm.

| Sample | Sample weight [mg] | $\text{CF}_3$ concentration [ $\mu\text{mol/g}$ ] |
|--------|--------------------|---------------------------------------------------|
| P35    | 3.39               | 10.4±0.5                                          |
| P99    | 1.94               | 26±1                                              |
| P946   | 3.15               | 367±18                                            |

## 5. References

- (1) Noiset, O.; Henneuse, C.; Schneider, Y.-J.; Marchand-Brynaert, J. *Macromolecules* **1997**, *30*, 540-548.

- (2) Adden, N.; Gamble, L. J.; Castner, D. G.; Hoffmann, A.; Gross, G.; Menzel, H. *Biomacromolecules* **2006**, *7*, 2552-2559.
- (3) Manova, R. K.; Pujari, S. P.; Weijers, C. A. G. M.; Zuilhof, H.; van Beek, T. A. *Langmuir* **2012**, *28*, 8651-8663.
- (4) Hennig, A.; Borcherdig, H.; Jaeger, C.; Hatami, S.; Würth, C.; Hoffmann, A.; Hoffmann, K.; Thiele, T.; Schedler, U.; Resch-Genger, U. *J. Am. Chem. Soc.* **2012**, *134*, 8268-8276.
- (5) Schneider, C. A.; Rasband, W. S.; Eliceiri, K. W. *Nat. Methods* **2012**, *9*, 671-675.
- (6) *ISO 15472:2010, Surface chemical analysis - X-ray photoelectron spectrometers - Calibration of energy scales.*; International Organization for Standardization: Geneva, Switzerland, 2010.
- (7) *ISO 19318:2004, Surface chemical analysis - X-ray photoelectron spectroscopy - Reporting of methods used for charge control and charge correction.*; International Organization for Standardization: Geneva, Switzerland, 2004.
- (8) Beamson, G.; Briggs, D. *High Resolution XPS of Organic Polymers*; Wiley: Chichester, UK, 1992.
- (9) Gross, T.; Lippitz, A.; Unger, W. E. S.; Woll, C.; Hahner, G.; Braun, W. *Appl. Surf. Sci.* **1993**, *68*, 291-298.
- (10) Massiot, D.; Fayon, F.; Capron, M.; King, I.; Le Calve, S.; Alonso, B.; Durand, J. O.; Bujoli, B.; Gan, Z. H.; Hoatson, G. *Magn. Reson. Chem.* **2002**, *40*, 70-76.
- (11) Gross, T.; Pippig, F.; Merz, B.; Merz, R.; Vohrer, U.; Mix, R.; Steffen, H.; Bremser, W.; Unger, W. E. S. *Plasma Processes Polym.* **2010**, *7*, 494-503.
- (12) Malz, F.; Jancke, H. *J. Pharm. Biomed. Anal.* **2005**, *38*, 813-823.
- (13) Malz, F. In *NMR Spectroscopy in Pharmaceutical Analysis*, Holzgrabe, U.; Wawer, I.; Diehl, B., Eds.; Elsevier: Amsterdam, 2008, pp 43-62.
